# Supplementary material for: Investigating the anti-inflammatory and immune-modulatory effects of “Gola” guava fruit and leaf extract in alleviating papain-induced knee osteoarthritis
Source: Frontiers journal article supplement (doi:10.3389/fsufs.2024.1442219), 2024-07-17

## *Supplementary Material*

### **1 Supplementary Data**

#### **Toxicity evaluation tests**

##### **1. Methods**

###### **1.1 Renal Function Test**

Renal function tests were performed using commercial diagnostic kits to estimate serum urea and creatinine levels by following the method described in literature(1).

###### **1.2 Liver Function Tests**

The activity of liver enzymes, alkaline phosphatase (ALP), aspartate transaminase (AST), and alanine transaminase (ALT), was measured using King's technique and commercial reagent kits through a spectrophotometer (2).

##### **2. Results**

###### **2.1 Toxicity evaluation**

Liver and kidney functions were assessed to measure the effect of OA induction and the toxicity of GF and GL extracts in rats. Data exhibited that mean values of serum urea, creatinine, ALT, AST, and ALP varied significantly ( $p < 0.01$ ) throughout the study with respective treatments. Significantly high ( $p < .001$ ) serum urea, creatinine, ALT, AST, and ALP values were observed in the positive control ( $T_1$ ) group (s.Table 1). Data unambiguously shows a significantly lower value in  $T_5$  group.

##### **3. Discussion**

In this study, the toxicological evaluation of 50% of the guava fruit and leaf extract was also carried out by evaluating kidney and liver function parameters to evaluate the safety profile of guava fruit and leaf extract. Compared to the negative control group, slightly elevated serum urea and creatinine levels were observed in papain-induced osteoarthritic rats. This result is consistent with the outcome of Yamada et al. (2020), who observed elevated serum urea and creatinine levels in osteoarthritic rats (3). The current study's data evinced that high GF50% and GL50% doses potentially alleviated the elevated serum urea level in osteoarthritic rats. Various studies corroborate the nephroprotective properties of

guava fruit and leaf extract by curtailing serum urea and creatinine levels, eventually ameliorating renal function (4,5). ALT, AST, and ALP activity were assessed to evaluate the toxicity of high doses of guava fruit and leaf extracts on liver function. The outcomes of that study corroborated the hepatic protective activity of guava fruit and guava leaf extracts and indicated that 400 mg/kg GL50% significantly alleviated the liver enzymes. The result of the current study is aligned with previous studies showing that guava fruits and leaf extract have the potential to alleviate the elevated ALT level (6,7). This study endorsed the fact that these extracts, even at high doses, are non-toxic and safe for treating KOA. That research result accorded with the previous study (8). He concluded that 5 to 500 mg/kg of guava leaf extract for oral use in rats showed no toxicity signs or death, and it is safe even at 500 mg/kg.

## References

1. Yakubu MT, Bilbis LS, Lawal M, Akanji MA. Evaluation of selected parameters of rat liver and kidney function following repeated administration of yohimbine. *Biokemistri*. 2003;15(2): 50–56.
2. King J. The transferases-alanine and aspartate transaminases. *Practical clinical enzymology*. 1965;
3. Yamada EF, Olin LC, Pontel CL, da Rosa HS, Folmer V, da Silva MD. Sida tuberculata reduces oxidative stress and pain caused by the knee osteoarthritis. *Journal of ethnopharmacology*. 2020;248: 112277.
4. Hamid M, Mohamed MM. Nephro-protective effects of grape and guava seeds extracts on gentamicin induced nephrotoxicity in rats. *Journal of Environmental Science. Ain Shams*. 2021;50(9): 333–357.
5. Wu T, Liu H, Lin S, Yu Y, Wei C. Extracts from guava fruit protect renal tubular endothelial cells against acetaminophen-induced cytotoxicity. *Molecular medicine reports*. 2018;17(4): 5544–5551.
6. Uboh FE, Okon IE, Ekong MB. Effect of aqueous extract of Psidium guajava leaves on liver enzymes, histological integrity and hematological indices in rats. *Gastroenterology research*. 2010;3(1): 32–38.
7. Nor NM, Yatim AM. Effects of pink guava (Psidium guajava) puree supplementation on antioxidant enzyme activities and organ function of spontaneous hypertensive rat. *Sains Malaysiana*. 2011;40(4): 369–372.
8. Babatola LJ, Oboh G, Ademiluyi AO. Toxicological evaluation of aqueous extract of different varieties of guava (Psidium guajava Linn) leaves. *Comparative Clinical Pathology*. 2019;28: 1689–1697.

## 2 Supplementary Figures and Tables

### 2.1 Supplementary Tables

**sTable 1:** Mean values (mean  $\pm$  SD) for serum urea (mmol/L), creatinine (mmol/L), ALT (U/mL), AST (U/mL), ALP (U/mL) of papain induced osteoarthritic rats

| <b>Serum urea</b> | <b>0 Day</b>           | <b>Effect</b> | <b>15 Days</b>         | <b>Effect</b> | <b>30 Days</b>         |
|-------------------|------------------------|---------------|------------------------|---------------|------------------------|
| T0                | 57.99±0.854C           | 2.67^         | 59.53±0.843D           | 2.79 √        | 57.87±0.583E           |
| T1                | 59.25±0.893Aa          | 2.10^         | 60.49±0.892Cc          | 3.20^         | 62.43±1.422Aa          |
| T2                | 57.64±0.833Cc          | 7.89^         | 62.19±1.042Aa          | 1.76 √        | 61.09±0.733Bb          |
| T3                | 56.93±0.853Dd <b>B</b> | 8.95^         | 62.03±1.954Aa <b>A</b> | 1.51 √        | 61.09±0.754Bb <b>A</b> |
| T4                | 57.86±0.583Cc          | 6.86^         | 61.83±0.742Bb          | 3.36 √        | 59.75±0.583Cc          |
| T5                | 58.8±0.633Bb <b>A</b>  | 5.07^         | 61.79±1.045Bb <b>B</b> | 5.71 √        | 58.26±0.943Dd <b>B</b> |
| <b>Creatinine</b> |                        |               |                        |               |                        |
| T0                | 0.61±0.783C            | 2.17^         | 0.63±0.492E            | 0.00^         | 0.63±0.292D            |
| T1                | 0.62±0.393Bb           | 13.98^        | 0.71±0.743Bb           | 5.19^         | 0.74±0.854Aa           |
| T2                | 0.63±0.482Aa           | 16.49^        | 0.73±0.742Aa           | 0.91 √        | 0.72±0.872Cc           |
| T3                | 0.60±0.872Dd <b>A</b>  | 20.99^        | 0.73±0.853Aa <b>A</b>  | 0.91 √        | 0.72±0.642Cc <b>A</b>  |
| T4                | 0.61±0.042Cc           | 10.38^        | 0.67±0.643CDc          | 7.92          | 0.73±0.482Bb           |
| T5                | 0.61±0.643Cc <b>A</b>  | 13.66^        | 0.69±1.322Cd <b>B</b>  | 13.94 √       | 0.6±1.492Ed <b>B</b>   |
| <b>ALT</b>        |                        |               |                        |               |                        |
| T0                | 66.48±1.302A           | 0.08^         | 66.53±0.492E           | 0.08 √        | 66.48±0.393E           |
| T1                | 61.61±1.021Bb          | 30.10^        | 80.16±0.843Dd          | 36.72         | 109.6±0.482Aa          |
| T2                | 66.49±0.643Aa          | 28.09^        | 85.17±0.733Aa          | 1.02 √        | 84.30±0.872Bb          |
| T3                | 66.44±1.492Aa <b>A</b> | 26.97^        | 84.35±1.322Bb <b>A</b> | 1.21 √        | 83.33±0.042Cc <b>A</b> |
| T4                | 66.71±1.032Aa          | 26.86^        | 84.63±0.854Bb          | 0.52 √        | 84.18±0.983Bb          |

|            |                         |                    |                          |                   |                         |
|------------|-------------------------|--------------------|--------------------------|-------------------|-------------------------|
| T5         | 66.71±1.302Aa <b>A</b>  | 24.10 <sup>^</sup> | 82.79±0.593Cc <b>B</b>   | 16.82 ∨           | 68.87±1.032Dd <b>B</b>  |
| <b>AST</b> |                         |                    |                          |                   |                         |
| T0         | 117.82±0.854C           | 2.93 <sup>^</sup>  | 121.27±0.733E            | 0.45 <sup>^</sup> | 121.81±1.492E           |
| T1         | 117.53±0.893Cc          | 18.98 <sup>^</sup> | 139.84±0.432Cb           | 9.12 <sup>^</sup> | 152.59±0.733Aa          |
| T2         | 117.54±0.833Cc          | 20.42 <sup>^</sup> | 141.54±0.482Aa           | 5.73 ∨            | 133.43±1.322Bb          |
| T3         | 120.06±0.853Aa <b>A</b> | 17.26 <sup>^</sup> | 140.79±0.522ABa <b>A</b> | 5.23 ∨            | 133.43±0.854Bb <b>A</b> |
| T4         | 118.21±0.583Bb          | 17.59 <sup>^</sup> | 139±0.583Cb              | 4.41 ∨            | 132.87±0.593Cc          |
| T5         | 117.39±0.633Cc <b>B</b> | 10.21 <sup>^</sup> | 129.37±1.422Dc <b>B</b>  | 5.34 ∨            | 122.46±0.744Dd <b>B</b> |
| <b>ALP</b> |                         |                    |                          |                   |                         |
| T0         | 78.29±0.783A            | 1.17 <sup>^</sup>  | 79.20±0.633E             | -0.57 ∨           | 78.75±1.103D            |
| T1         | 75.86±0.393Dc           | 43.28 <sup>^</sup> | 108.69±0.873Aa           | 9.74 <sup>^</sup> | 119.28±0.933Aa          |
| T2         | 71.78±0.482Fe           | 46.16 <sup>^</sup> | 104.91±0.783Bb           | 16.86 ∨           | 87.23±0.042Bb           |
| T3         | 74.03±0.872Ed <b>B</b>  | 39.99 <sup>^</sup> | 103.63±0.722Cc <b>A</b>  | 15.82 ∨           | 87.23±0.983Bb <b>A</b>  |
| T4         | 77.25±0.042Ba           | 35.36 <sup>^</sup> | 104.56±1.001Bb           | 19.16 ∨           | 84.53±0.583Cc           |
| T5         | 76.79±0.984Cb <b>A</b>  | 26.26 <sup>^</sup> | 96.96±0.073Dd <b>B</b>   | 24.91 ∨           | 72.80±0.393Ed <b>B</b>  |

T<sub>0</sub>: Control group, T<sub>1</sub>: Positive group, T<sub>2</sub>: 200 mg/kg GF50%, T<sub>3</sub>: 400 mg/kg GF50%, T<sub>4</sub>: 200 mg/kg GL50%, T<sub>5</sub>: 400 mg/kg GL50%

ALT: Alkaline phosphatase, AST: Aspartate transaminase, ALP: Alanine transaminase

Capital lettering show comparison among T<sub>0</sub> to T<sub>5</sub>, Small lettering show comparison among T<sub>1</sub> to T<sub>5</sub>, Colored lettering show comparison among T<sub>3</sub> & T<sub>5</sub>

Effect D0-D15: ( $\mu_0 - \mu_{15}$ )/SD, Effect D15-30: ( $\mu_{15} - \mu_{30}$ )/SD, <sup>^</sup>: Effect size increase; ∨: Effect size decrease

means sharing the same letters in a column are not significantly different from each other at  $p < 0.05$ .

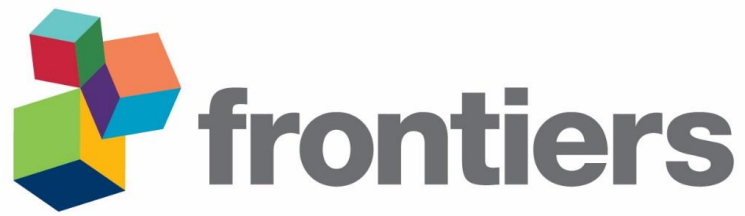

Supplement: Data_Sheet_1.PDF [file Data_Sheet_1.PDF]
